# Supplementary material
Source: MDPI journal article supplement (https://www.mdpi.com/2220-9964/10/8/494)
Supplement: s1 [file s1]

| spatialUnit | spatialUnit | phenomen | PRECIP  | EVAP_TSP | PRECIP-EVAP_TSP | metadata_                             | metadata_ |
|-------------|-------------|----------|---------|----------|-----------------|---------------------------------------|-----------|
| PTRH1       | euRBDCode   | 2018     | 2711.9  | 1516.1   | 1195.8          | <a href="https://cdr">https://cdr</a> | 43892.71  |
| PTRH2       | euRBDCode   | 2018     | 2515    | 1697.8   | 817.2           | <a href="https://cdr">https://cdr</a> | 43892.71  |
| PTRH3       | euRBDCode   | 2018     | 11812.3 | 10867.4  | 944.9           | <a href="https://cdr">https://cdr</a> | 43892.71  |
| PTRH4A      | euRBDCode   | 2018     | 9730.4  | 6671.7   | 3058.7          | <a href="https://cdr">https://cdr</a> | 43892.71  |
| PTRH5A      | euRBDCode   | 2018     | 11642   | 12092.5  | -450.5          | <a href="https://cdr">https://cdr</a> | 43892.71  |
| PTRH6       | euRBDCode   | 2018     | 3241.3  | 1473.3   | 1768            | <a href="https://cdr">https://cdr</a> | 43892.71  |
| PTRH7       | euRBDCode   | 2018     | 2589.4  | 4178     | -1588.6         | <a href="https://cdr">https://cdr</a> | 43892.71  |
| PTRH8       | euRBDCode   | 2018     | 1302.1  | 732.9    | 569.2           | <a href="https://cdr">https://cdr</a> | 43892.71  |

metadata\_metadata\_metadata\_UID

|       |   |       |
|-------|---|-------|
| valid | A | 52823 |
| valid | A | 52824 |
| valid | A | 52825 |
| valid | A | 52826 |
| valid | A | 52827 |
| valid | A | 52828 |
| valid | A | 52829 |
| valid | A | 52830 |
